# Supplementary material for: Tissue-Oxygen-Adaptation of Bone Marrow-Derived Mesenchymal Stromal Cells Enhances Their Immunomodulatory and Pro-Angiogenic Capacity, Resulting in Accelerated Healing of Chemical Burns
Source: MDPI journal article supplement (doi:10.3390/ijms24044102), 2023-02-17
Supplement: s1 [file s1]

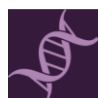

Article

# Tissue Oxygen Adaptation of Bone Marrow-Derived Mesenchymal Stromal Cells Enhances Their Immunomodulatory and Pro-Angiogenic Capacity, Resulting in Accelerated Healing of Chemical Burns

## Supplementary Information

**Table S1.** Primary eschar desquamation and re-epithelialization rates.

| Group            | Primary eschar desquamation rate, % |        |        | Re-epithelialization rate on day 28, % |
|------------------|-------------------------------------|--------|--------|----------------------------------------|
|                  | Day 14                              | Day 23 | Day 28 |                                        |
| Saline           | 28,6                                | 71,4   | 85,7   | 85,7                                   |
| 21 % oxygen MSCs | 0                                   | 42,9   | 85,7   | 85,7                                   |
| 5 % oxygen MSCs  | 14,3                                | 100    | 100    | 100                                    |

**Table S2.** Gene-specific primers used in the qPCR experiments.

| Gene   | Sequence ID    | Name of the primer | Sequence of the primer | Product size, bp |
|--------|----------------|--------------------|------------------------|------------------|
| IFNG   | NM_000619.3    | IFNG forward       | GGTCATTCAGATGTAGCGGA   | 281              |
|        |                | IFNG reverse       | TGCATCCTTTTCGCCTTGC    |                  |
| TNFA   | NM_000594.4    | TNFA forward       | GTTGTAGCAAACCCTCAAGC   | 148              |
|        |                | TNFA reverse       | TCACCCCGAAGTTCAGTAGA   |                  |
| IL6    | NM_000600.5    | IL6 forward        | ATGTGTGAAAGCAGCAAAGAGG | 179              |
|        |                | IL6 reverse        | TGCAAGTGCATCATCGTTGT   |                  |
| IL1B   | NM_000576.3    | IL1B forward       | GATGCACCTGTACGATCACT   | 229              |
|        |                | IL1B reverse       | CACGGGAAAGACACAGGTAG   |                  |
| IL12A  | NM_000882.4    | IL12A forward      | CTCCTGGACCACCTCAGTTTG  | 89               |
|        |                | IL12A reverse      | AGCTCCCTCTTGTGTGGAA    |                  |
| IL23A  | NM_016584.3    | IL23A forward      | CTTCTCTGCTCCCTGATAGC   | 90               |
|        |                | IL23A reverse      | TTCGAAGGATCTTGAACGG    |                  |
| IL10   | NM_000572.3    | IL10 forward       | GCAAAACCAAACCACAAGACAG | 194              |
|        |                | IL10 reverse       | AGTCCTGCATTAAGGAGTCG   |                  |
| TGFB1  | NM_000660.7    | TGFB1 forward      | TGGTGGAACCCACAACGAA    | 113              |
|        |                | TGFB1 reverse      | GTAGCGAAGTGCAGGTCAAT   |                  |
| EGF    | NM_001963.6    | EGF forward        | GGATTGACACAGAAGGAACCA  | 156              |
|        |                | EGF reverse        | TCTATCCACTTCAGGGCTGT   |                  |
| VEGFA  | NM_001025366.3 | VEGFA forward      | CAGCTACTGCCATCCAATCG   | 165              |
|        |                | VEGFA reverse      | AACACAAGTCCACAGCAGTC   |                  |
| BFGF   | NM_002006.6    | BFGF forward       | ATGTAGAAGATGTGACGCCG   | 141              |
|        |                | BFGF reverse       | AGTTCGTTTCAGTGCCACAT   |                  |
| 18SRNA | NR_003286.4    | 18S RNA forward    | CAGCCACCCGAGATTGAGCA   | 253              |
|        |                | 18S RNA reverse    | GGACAGGACTAGGCGGAACA   |                  |

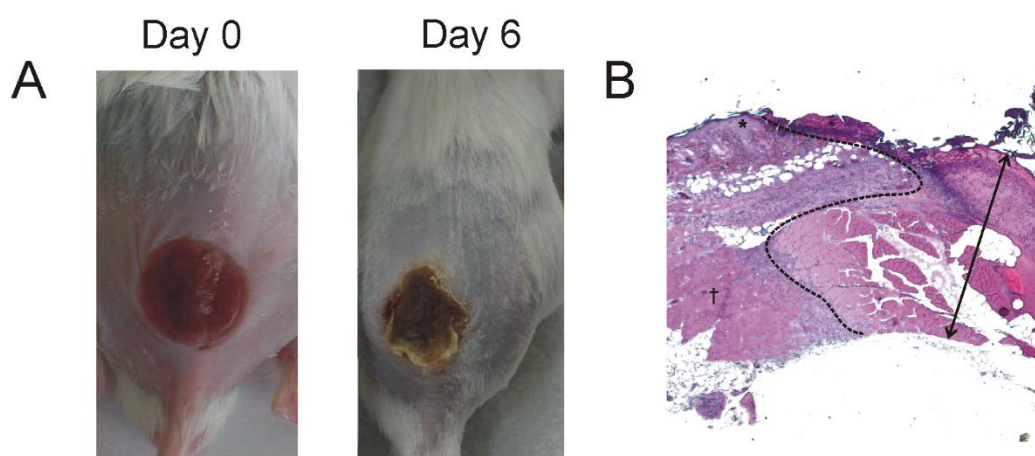

**Figure S1.** Characteristics of alkali burn wounds on Balb/c mice model. (A) Images of the alkali burns immediately after injury and on day 6. (B) Image of histological section of the wound and adjacent healthy tissues on day 6 after alkali burn. The border between non-damaged and necrotic tissue is outlined with black dashed line. Double-headed arrow shows full-skin necrosis and necrosis of underlying *panniculus carnosus* (asterisk) muscle. Black star indicates formation of migrating epithelial tongue in the wound edge.

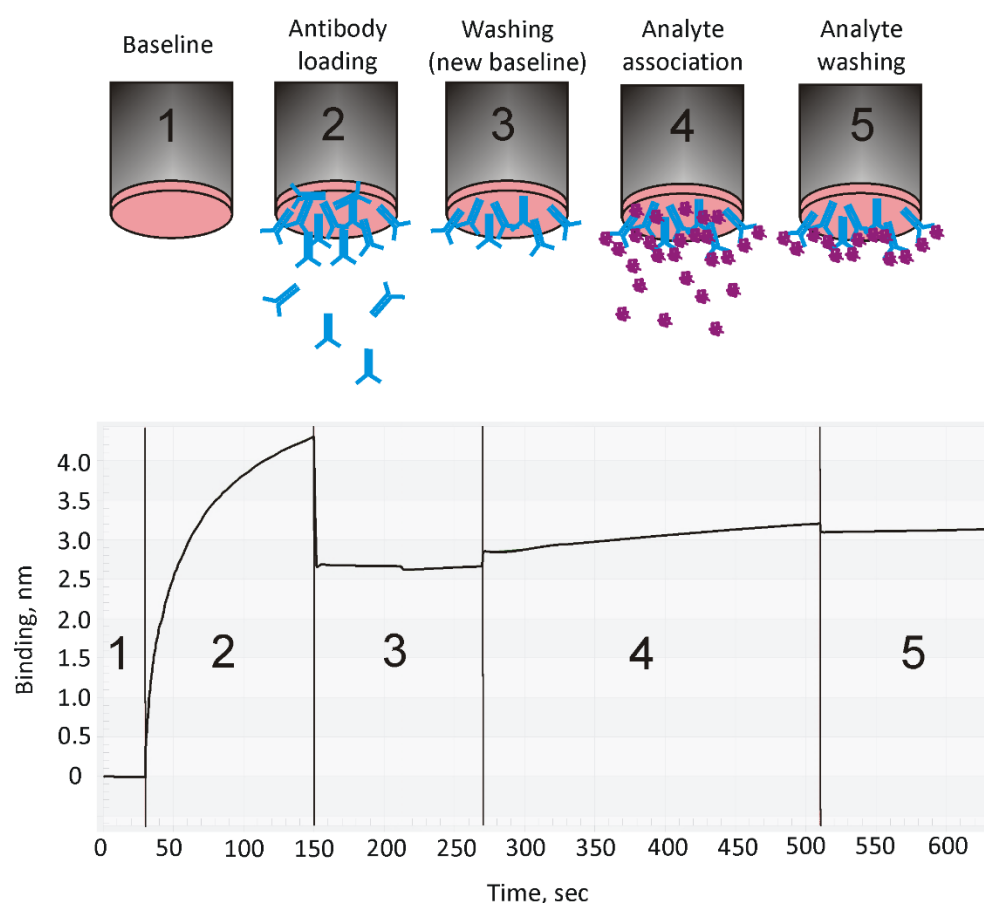

**Figure S2.** The scheme of bio-layer interferometry measurement of VEGFA binding. The procedure includes 5 steps: 1 – baseline registration (in PBS); 2 – immobilization of antibodies to VEGFA (ab52917, Abcam) on a biosensor with conjugated protein A; 3 – washing out the unbound antibodies and registration of a new baseline; 4 – detection of VEGFA in the sample; 5 – washing out the unbound VEGFA.
